# Supplementary material for: A VIRUS DISEASE OF PEA CAUSED BY WATERMELON MOSAIC VIRUS
Source: MDPI journal article supplement (doi:10.3390/ijms231911588), 1964-01-01
Supplement: s1 [file s1]

## Supplementary Table S7

List of oligonucleotides used in this study

| Plasmids                                      | Oligonucleotide primers                             |                                                                  |
|-----------------------------------------------|-----------------------------------------------------|------------------------------------------------------------------|
|                                               | Sense                                               | Antisense                                                        |
| Y37A                                          | 5'-GGTACTTTGCCCCATTTCC-3'                           | 5'-GGAAATGGGGCAAAGTACC-3'                                        |
| P38A                                          | 5'-GTACTTTTACGCATTTCCAGTTCC-3'                      | 5'-GGAAGTGGAAATGCGTAAAAGTAC-3'                                   |
| F39A                                          | 5'-CTTTTACCCAGCTCCAGTTCCACC-3'                      | 5'-GGTGGAAGTGGAGCTGGGTAAAAG-3'                                   |
| P40A                                          | 5'-CTTTTACCCATTTGCAGTTCCACC-3'                      | 5'-GGTGGAAGTGCAAATGGGTAAAAG-3'                                   |
| V41A                                          | 5'-CCCATTTCCAGCTCCACCTTTAC-3'                       | 5'-GTAAAGGTGGAGCTGGAAATGGG-3'                                    |
| P42A                                          | 5'-CCCATTTCCAGTTGCACCTTTAC-3'                       | 5'-GTAAAGGTGCAACTGGAAATGGG-3'                                    |
| P43A                                          | 5'-CATTCCAGTTCCAGCTTTACTTTATC-3'                    | 5'-GATAAAGTAAAGCTGGAAGTGGAAATG-3'                                |
| L44A                                          | 5'-CAGTTCCACCTGCACCTTTATCAAG-3'                     | 5'-CTTGATAAAGTGCAGGTGGAAGT-3'                                    |
| L45A                                          | 5'-CAGTTCCACCTTAGCTTATCAAGTG-3'                     | 5'-CACTTGATAAGCTAAAGGTGGAAGT-3'                                  |
| Y46A                                          | 5'-CCACCTTTACTTGCTCAAGTGGAAAC-3'                    | 5'-GTTCCACTTGAGCAAGTAAAGGTGG-3'                                  |
| N47A                                          | 5'-CTTTACTTTTATGCAGTGGAAAC-3'                       | 5'-GTTCCACTGCATAAAGTAAAAG-3'                                     |
| V48A                                          | 5'-CTTTATCAAGCGGAACCTTCTG-3'                        | 5'-CAGAAAGTTCCGCTTGATAAAG-3'                                     |
| E49A                                          | 5'-TATCAAGTGGCACTTTCTGTGG-3'                        | 5'-CCACAGAAAGTGCCACTTGATA-3'                                     |
| L50A                                          | 5'-CAAGTGGAAAGCTTCTGTGGG-3'                         | 5'-CCCACAGAAAGCTTCCACTTG-3'                                      |
| S51A                                          | 5'-GTGGAAGTTGCTGTGGGAGG-3'                          | 5'-CCTCCACAGCAAGTTCCAC-3'                                        |
| RBD2                                          | 5'-TACCGAATTCATGTATAAGCCTGTTGACCCTTAC-3'            | 5'-TACCACCGGTGATTCTCTTCCATTACCTCCAG-3'                           |
| RBD2 <sup>Δ51</sup>                           | 5'-TACCGAATTCATGGTGGGAGGACAGCAATTTAATG-3'           | 5'-TACCACCGGTGATTCTCTTCCATTACCTCCAG-3'                           |
| RBD2 <sup>Δ46</sup>                           | 5'-TACCGAATTCATGCAAGTGGAACTTCTGTGGG-3'              | 5'-TACCACCGGTGATTCTCTTCCATTACCTCCAG-3'                           |
| RBD2 <sup>Δ37</sup>                           | 5'-TACCGAATTCATGCCATTTCCAGTTCCACCTTTAC-3'           | 5'-TACCACCGGTGATTCTCTTCCATTACCTCCAG-3'                           |
| MAP4K1                                        | 5'-CTCGAGATGGACGTCGTGGACCCGTGAC-3'                  | 5'-ATTCATAAGCGGCCGCTCCTGGATGTAGAGGTTG-3'                         |
| MAP4K1 <sup>F651A</sup>                       | 5'-GCAGGTGCTGGCCCCACTGCCG-3'                        | 5'-CGGCAGTGGGGCCAGCACCTGC-3'                                     |
| TRIM25                                        | 5'-GGAGGGAGACTTTCAGTCCTTGAC-3'                      | 5'-ATAGGTCAGGCTGACTCAAAGCC-3'                                    |
| TRIP12                                        | 5'-GTTTCATCTGTACTTGACATTTTATCC-3'                   | 5'-GTCCCGTGATTGAAGGAGG-3'                                        |
| ZNF598                                        | 5'-TGCTGGGACCTGTTGTTGC-3'                           | 5'-CACAACACATCTGTGACATCTGACT-3'                                  |
| STAU1 <sup>55</sup> -HA <sub>3</sub> -BioID2  | 5-ATATATGAGTCATGAAACTTGGAAAAAACAATG-3               | 5'-ATATATAGCGCTGGCACCTCCACACACAGAC-3                             |
| STAU1 <sup>55</sup> -HA <sub>3</sub> -TurboID | 5'-TAAGCAGCGGGCCGCGCCACCATGAACTTGGAAAAA<br>AACCA-3' | 5'-TGTACAGCTAGCGAATTCGAATCCGGAGACGTA<br>CGATGCGTAATCCGGTACATC-3' |
| HPRT                                          | 5'-GCTTTCCTTGGTCAGGCAGAT-3'                         | 5'-CTTCGTGGG GTCCCTTTCACC-3'                                     |
| RPL22                                         | 5'-TTGCTGTTAGCAACTACGCGCAAC-3'                      | 5'-TGGTGACCATCGAAAGGAGCAAGA-3'                                   |
