# Supplementary material for: A VIRUS DISEASE OF PEA CAUSED BY WATERMELON MOSAIC VIRUS
Source: MDPI journal article supplement (doi:10.3390/ijms231911588), 1964-01-01
Supplement: s1 [file s1]

## Supplementary figures

**Supplementary Figure S1. STAU1<sup>55</sup> is tagged by K11-ubiquitin chains.** HEK293T cells were co-transfected with plasmids coding for STAU1<sup>55</sup>-HA<sub>3</sub> (STAU1) or deletion mutants and for GFP-ubi (+) **(A)** or GFP-ubi-K11R (+) **(B)**. Cells expressing GFP-ubi or GFP-ubi-K11R were further incubated in the presence (+) or absence (-) of MG132 for 8 h. Protein extracts were analyzed by western blotting using anti-HA (to detect STAU1) and anti-GFP (to detect total protein ubiquitination) antibodies. The blots are representative of three independently performed experiments that gave similar results.

**Supplementary Figure S2. In silico modelling of the FPL-motif.** **(A)** In silico modelling (I-Tasser software) of the RBD2 domain with the position of amino acids of the FPL-motif. While the predicted alpha helices ( $\alpha$ 1 and  $\alpha$ 2) and the beta sheaths ( $\beta$ 2 and  $\beta$ 3) of RNA-binding domains are conserved, the beta sheath  $\beta$ 1 is disordered in the modelling. The FPL-motif is located in the loop between the disordered region and  $\beta$ -sheath 2 (Phe<sup>39</sup>, Pro<sup>40</sup>, Pro<sup>42</sup>, Leu<sup>45</sup>) and in the beta sheath  $\beta$ 2 (Leu<sup>50</sup>). **(B-M)** Amino acid conservation of the FPL-motif through evolution. Blue columns: amino acids required for the function of the FPL-motif. Homo, humans. Macaca, macaques. Rattus, rats. Mus, mice. Bos, cattle. Canis, dog. Xenopus, frogs. Gallus, chicken. Danio, zebrafish.

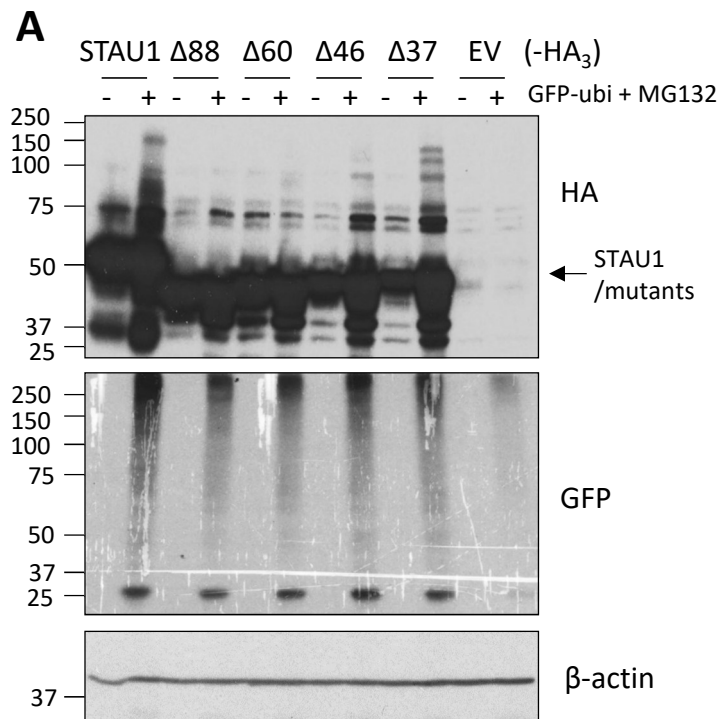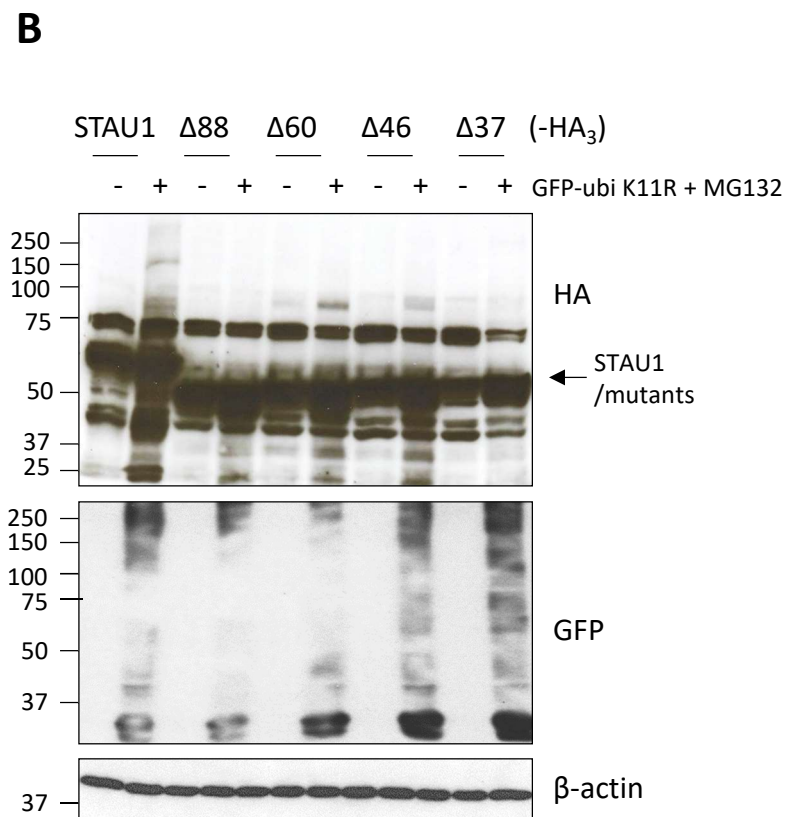

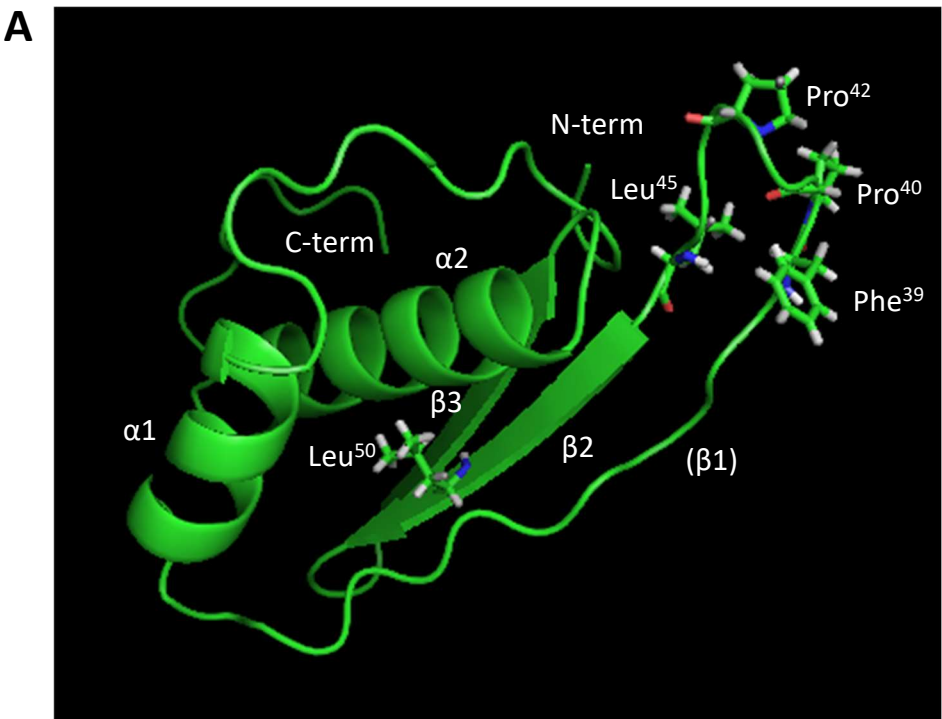

**B STAU1**

|         |   |   |   |   |   |   |   |   |   |   |   |   |   |   |   |
|---------|---|---|---|---|---|---|---|---|---|---|---|---|---|---|---|
| Homo    | Y | P | F | P | V | P | P | L | L | Y | Q | V | E | L | S |
| Macaca  | Y | P | F | P | V | P | P | L | L | Y | Q | V | E | L | S |
| Rattus  | Y | P | F | P | V | P | P | L | L | Y | Q | V | E | L | S |
| Mus     | Y | P | F | P | V | P | P | L | L | Y | Q | V | E | L | S |
| Bos     | Y | P | F | P | V | P | P | L | L | Y | Q | V | E | L | S |
| Canis   | Y | P | F | P | V | P | P | L | L | Y | Q | V | E | L | S |
| Xenopus | Y | P | F | P | V | A | P | I | L | Y | Q | V | E | L | S |
| Gallus  | Y | P | F | P | V | G | P | L | L | Y | Q | V | E | L | S |
| Danio   | Y | P | F | P | V | G | P | V | L | Y | H | M | E | L | S |

**C MAP4K1**

|         |   |   |   |   |   |   |   |   |   |   |   |   |   |   |   |
|---------|---|---|---|---|---|---|---|---|---|---|---|---|---|---|---|
| Homo    | V | L | F | P | L | P | T | P | L | S | V | F | A | L | L |
| Macaca  | V | L | F | P | L | P | T | P | L | S | V | F | A | L | L |
| Rattus  | V | L | F | P | L | P | T | P | L | P | V | F | A | L | L |
| Mus     | V | L | F | P | L | P | T | P | L | P | V | F | T | L | L |
| Bos     | V | L | F | P | L | P | T | P | L | P | V | F | A | L | L |
| Canis   | V | L | F | P | L | P | T | P | L | P | V | F | A | L | L |
| Xenopus | F | D | F | P | L | P | N | P | L | R | V | F | Q | M | L |
| Gallus  | F | D | F | P | L | P | S | P | L | R | V | F | E | M | L |

**D ABCC11**

|        |   |   |   |   |   |   |   |   |   |   |   |   |   |   |   |
|--------|---|---|---|---|---|---|---|---|---|---|---|---|---|---|---|
| Homo   | P | R | F | P | A | P | Q | P | L | D | N | A | G | L | F |
| Macaca | P | R | F | P | A | P | Q | P | L | D | D | A | G | L | F |
| Bos    | P | K | F | P | E | P | Q | P | L | D | D | A | G | L | F |
| Canis  | P | K | F | P | A | P | Q | P | M | D | D | A | G | L | F |

**E ABCF1**

|         |   |   |   |   |   |   |   |   |   |   |   |   |   |   |   |
|---------|---|---|---|---|---|---|---|---|---|---|---|---|---|---|---|
| Homo    | F | T | F | P | D | P | P | P | L | S | P | P | V | L | G |
| Macaca  | F | T | F | P | D | P | P | P | L | S | P | P | V | L | G |
| Rattus  | F | T | F | P | D | P | P | P | L | S | P | P | V | L | G |
| Mus     | F | T | F | P | D | P | P | P | L | S | P | P | V | L | G |
| Bos     | F | T | F | P | D | P | P | P | L | S | P | P | V | L | G |
| Canis   | F | T | F | P | N | P | P | P | L | S | P | P | V | L | G |
| Xenopus | F | T | F | P | N | P | P | P | L | S | P | P | I | L | G |
| Danio   | F | T | F | P | N | P | P | P | L | S | P | P | I | L | G |

**F ADGRG1**

|         |   |   |   |   |   |   |   |   |   |   |   |   |   |   |   |
|---------|---|---|---|---|---|---|---|---|---|---|---|---|---|---|---|
| Homo    | R | S | F | P | D | P | R | G | L | Y | H | F | C | L | Y |
| Macaca  | R | S | F | P | H | P | R | G | L | Y | H | F | C | L | Y |
| Rattus  | Y | F | F | P | E | P | R | G | L | Y | H | F | C | L | Y |
| Mus     | R | F | F | P | E | P | R | G | L | Y | H | F | C | L | Y |
| Bos     | W | P | F | P | L | P | R | G | L | Y | H | F | C | L | Y |
| Canis   | Q | L | F | P | E | P | R | G | L | Y | H | F | C | L | Y |
| Xenopus | F | T | L | Q | S | L | P | G | P | Y | I | F | C | V | H |
| Gallus  | Y | S | L | P | T | T | L | G | R | Y | R | F | C | I | Y |
| Danio   | L | D | S | N | P | H | Q | N | Q | S | H | F | C | V | F |

**G GPR83**

|         |   |   |   |   |   |   |   |   |   |   |   |   |   |   |   |
|---------|---|---|---|---|---|---|---|---|---|---|---|---|---|---|---|
| Homo    | P | D | F | P | E | P | A | D | L | F | W | K | Y | L | D |
| Macaca  | P | D | F | P | E | P | A | D | L | F | W | K | Y | L | D |
| Rattus  | P | D | F | P | E | P | A | D | L | F | W | K | Y | L | D |
| Mus     | P | D | F | P | E | P | A | D | L | F | W | K | Y | L | D |
| Bos     | P | D | F | P | E | P | A | D | L | F | W | K | Y | L | D |
| Canis   | P | D | F | P | E | P | A | D | L | F | W | K | Y | L | D |
| Xenopus | P | D | F | P | E | P | S | D | L | F | W | K | Y | L | D |
| Gallus  | P | D | F | P | E | P | A | D | L | F | W | K | Y | L | D |
| Danio   | P | S | F | P | H | P | S | D | L | F | W | K | Y | L | D |

**H KBTBD13**

|         |   |   |   |   |   |   |   |   |   |   |   |   |   |   |   |
|---------|---|---|---|---|---|---|---|---|---|---|---|---|---|---|---|
| Homo    | A | G | F | P | R | P | G | S | L | Q | T | F | L | L | R |
| Macaca  | A | G | F | P | R | P | G | S | L | Q | T | F | L | L | R |
| Rattus  | A | G | F | P | R | P | G | S | L | Q | T | F | L | L | R |
| Mus     | A | G | F | P | R | P | G | S | L | Q | T | F | L | L | R |
| Bos     | A | G | F | P | R | P | G | S | L | Q | T | F | L | L | R |
| Canis   | A | G | F | P | R | P | G | S | L | Q | T | C | L | L | R |
| Xenopus | A | G | F | N | R | G | G | S | L | H | T | F | F | L | R |
| Gallus  | S | E | F | P | S | P | H | Q | L | R | Y | D | V | R | L |
| Danio   | T | G | F | P | R | I | G | S | K | W | T | F | L | L | R |

**I LING04**

|         |   |   |   |   |   |   |   |   |   |   |   |   |   |   |   |
|---------|---|---|---|---|---|---|---|---|---|---|---|---|---|---|---|
| Homo    | T | A | F | P | S | P | D | K | L | V | T | L | R | L | S |
| Macaca  | T | A | F | P | S | P | D | K | L | V | T | L | R | L | S |
| Rattus  | T | A | F | P | S | P | D | K | L | V | T | L | R | L | S |
| Mus     | T | A | F | P | S | P | D | K | L | V | T | L | R | L | S |
| Bos     | T | A | F | P | S | P | D | K | L | V | T | L | R | L | S |
| Canis   | T | A | F | P | S | P | D | K | L | V | T | L | R | L | S |
| Xenopus | D | A | L | P | S | P | L | G | L | E | T | L | L | L | S |

**J MCHR2**

|         |   |   |   |   |   |   |   |   |   |   |   |   |   |   |   |
|---------|---|---|---|---|---|---|---|---|---|---|---|---|---|---|---|
| Homo    | F | F | F | P | L | P | L | I | L | V | C | Y | I | L | I |
| Macaca  | F | F | F | P | L | P | L | I | L | V | C | Y | I | L | I |
| Bos     | S | F | F | P | L | P | L | I | L | M | C | Y | I | L | I |
| Canis   | F | F | F | P | L | P | L | I | L | V | C | Y | I | L | I |
| Xenopus | F | F | F | P | L | P | L | I | L | A | C | Y | I | L | I |
| Gallus  | F | V | I | P | V | L | V | I | S | L | S | Y | T | R | T |

**K OMD**

|         |   |   |   |   |   |   |   |   |   |   |   |   |   |   |   |
|---------|---|---|---|---|---|---|---|---|---|---|---|---|---|---|---|
| Homo    | F | P | F | P | L | P | K | S | L | E | R | L | L | L | G |
| Macaca  | F | P | F | P | L | P | K | S | L | E | R | L | L | L | G |
| Rattus  | F | P | F | P | L | P | K | S | L | E | R | L | L | L | G |
| Mus     | F | P | F | P | L | P | K | S | L | E | R | L | L | L | G |
| Bos     | F | P | F | P | L | P | K | S | L | E | R | I | F | L | G |
| Canis   | F | P | F | P | L | P | K | S | L | E | R | L | L | L | G |
| Xenopus | I | P | P | D | L | P | S | S | V | E | R | L | N | F | A |
| Gallus  | F | P | F | P | L | P | S | S | L | E | R | L | L | L | G |
| Danio   | I | P | S | P | L | P | K | T | L | K | R | L | H | L | G |

**L UBE2F**

|         |   |   |   |   |   |   |   |   |   |   |   |   |   |   |   |
|---------|---|---|---|---|---|---|---|---|---|---|---|---|---|---|---|
| Homo    | V | H | F | P | D | P | N | K | L | H | C | F | Q | L | T |
| Macaca  | V | H | F | P | D | P | N | K | L | H | C | F | Q | L | T |
| Rattus  | V | H | F | P | D | P | N | K | L | H | C | F | Q | L | T |
| Mus     | V | H | F | P | D | P | N | K | L | H | C | F | Q | L | T |
| Bos     | V | H | F | P | D | P | N | K | L | H | C | F | Q | L | T |
| Canis   | V | H | F | P | D | P | N | K | L | H | C | F | Q | L | T |
| Xenopus | V | N | F | P | D | P | N | K | L | H | Y | F | H | L | T |
| Gallus  | V | N | F | P | D | P | N | K | L | H | Y | F | Q | L | T |
| Danio   | V | T | F | P | D | E | N | K | L | C | H | F | Q | L | A |

**M VCAM1**

|         |   |   |   |   |   |   |   |   |   |   |   |   |   |   |   |
|---------|---|---|---|---|---|---|---|---|---|---|---|---|---|---|---|
| Homo    | Q | G | F | P | A | P | K | I | L | W | S | R | Q | L | P |
| Macaca  | H | G | L | P | A | P | K | I | L | W | S | R | Q | L | P |
| Rattus  | D | G | F | P | T | P | K | I | L | W | S | R | Q | L | K |
| Mus     | D | G | I | P | A | P | K | I | L | W | S | R | Q | L | N |
| Bos     | N | G | L | P | A | P | K | I | L | W | S | R | K | L | S |
| Canis   | D | G | L | P | A | P | K | I | L | W | S | R | R | L | S |
| Xenopus | E | A | F | P | T | P | T | L | I | L | K | E | K | T | E |
| Gallus  | D | S | N | P | P | A | Q | V | F | W | R | K | H | L | A |
| Danio   | D | S | F | P | A | G | R | M | V | L | S | R | V | V | D |
